# Supplementary material
Source: publisher site journal article supplement (https://www.spandidos-publications.com/3688/downloadSupplementary)

Figure S1. Percentages of all gates for Fig. 1E and the original plots with the population hierarchies.

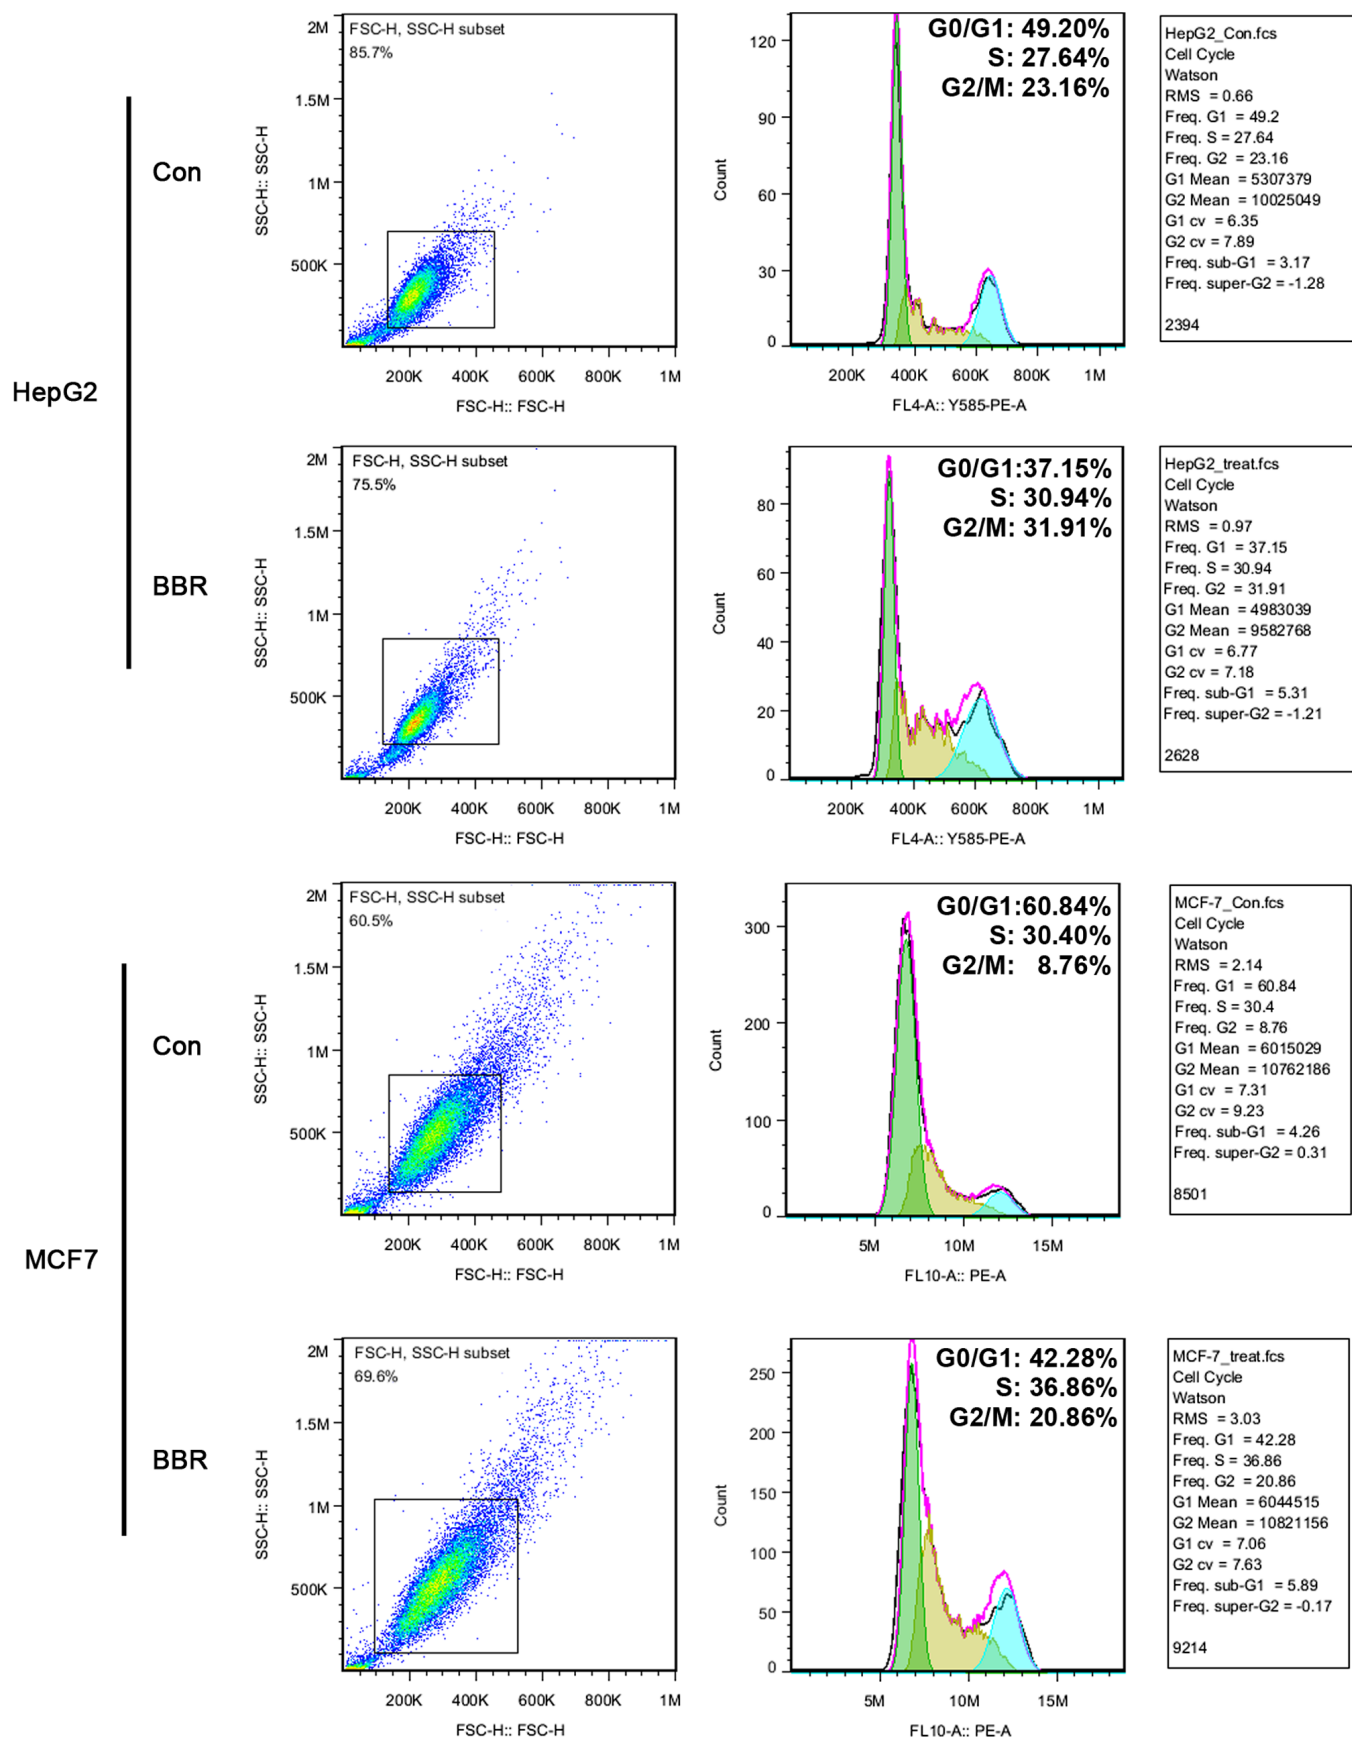

Supplement: Supplementary file 1 [file downloadSupplementary]
